# Supplementary material for: The Use of Nanoscale Montmorillonite (MMT) as Reinforcement for Polylactide Acid (PLA) Prepared by Fused Deposition Modeling (FDM)—Comparative Study with Biocarbon and Talc Fillers
Source: MDPI journal article supplement (doi:10.3390/ma15155205), 2022-07-27
Supplement: s1 [file s1]

## Supplementary information section

# The Use of Nanoscale Montmorillonite (MMT) as Reinforcement for Polylactide Acid (PLA) Prepared by Fused Deposition Modeling (FDM) – Comparative Study with Biocarbon and Talc Fillers

Jacek Andrzejewski <sup>1,2,\*</sup>, Mateusz Markowski <sup>2,3</sup> and Mateusz Barczewski <sup>1</sup>

<sup>1</sup> Polymer Processing Division, Institute of Materials Technology, Faculty of Mechanical Engineering, Poznan University of Technology, Piotrowo 3 Str., 61-138 Poznan, Poland; mateusz.barczewski@put.poznan.pl

<sup>2</sup> MATRIX Students Club, Polymer Processing Division, Institute of Materials Technology, Poznan University of Technology, Piotrowo 3 Str., 61-138 Poznan, Poland; mateusz.m.markowski@student.put.poznan.pl

<sup>3</sup> Faculty of Materials Engineering and Technical Physics, Poznan University of Technology, Piotrowo 3 Str., 61-138 Poznan, Poland

\* Correspondence: jacek.andrzejewski@put.poznan.pl; Tel.: +48-61-647-5858

Table S1. The mechanical properties of FDM printed samples.

| Sample     | Tensile Test |             |                     | Flexural Test |               | Charpy Test          |
|------------|--------------|-------------|---------------------|---------------|---------------|----------------------|
|            | Modulus      | Strength    | Elongation at Break | Modulus       | Strength      | Impact Strength      |
|            | [MPa]        | [MPa]       | [%]                 | [MPa]         | [MPa]         | [kJ/m <sup>2</sup> ] |
| PLA        | 2780 (±36)   | 39.4 (±0.9) | 1.9 (±0.1)          | 2700 (±115)   | 92.7 (±3.0)   | 2.5 (±0.2)           |
| PLA/1MMT   | 2120 (±44)   | 29.2 (±0.2) | 2.7 (±0.3)          | 2090 (±64)    | 69.5 (±3.1)   | 3.0 (±0.6)           |
| PLA/2MMT   | 2400 (±187)  | 33.5 (±1.7) | 2.8 (±0.1)          | 3040 (±119)   | 95.4 (±5.8)   | 2.4 (±0.4)           |
| PLA/5MMT   | 3470 (±18)   | 57.2 (±1.1) | 3.1 (±0.2)          | 3800 (±393)   | 129.2 (±10.5) | 3.8 (±0.1)           |
| PLA/10BC   | 2410 (±55)   | 54.6 (±1.1) | 2.1 (±0.1)          | 3700 (±240)   | 150.9 (±8.8)  | 2.0 (±0.2)           |
| PLA/20BC   | 3790 (±50)   | 54.7 (±0.5) | 1.7 (±0.1)          | 4230 (±146)   | 134.6 (±8.7)  | 1.6 (±0.3)           |
| PLA/10Talc | 3659 (±95)   | 54.1 (±0.6) | 2.9 (±0.1)          | 4120 (±60)    | 135.8 (±1.1)  | 1.8 (±0.2)           |
| PLA/20Talc | 4170 (±56)   | 57.1 (±0.3) | 2.2 (±0.1)          | 4840 (±110)   | 163.4 (±1.8)  | 2.9 (±0.3)           |

Table S2. The data obtained during the DSC measurements.

| Sample     | Peak position<br>[°C] |         | Enthalpy<br>[J/g] |         | Crystallinity<br>(content) *<br>[%] | Crystallization<br>peak<br>[°C] |
|------------|-----------------------|---------|-------------------|---------|-------------------------------------|---------------------------------|
|            | Cold cryst.           | Melting | Cold cryst.       | Melting |                                     |                                 |
|            |                       |         |                   |         |                                     |                                 |
| PLA        | 105.1                 | 169.1   | 36.9              | 53.9    | 18.2                                | 97.0                            |
| PLA/1MMT   | 98.1                  | 167.3   | 31.4              | 59.8    | 30.6                                | 102.3                           |
| PLA/2MMT   | 98.5                  | 167.1   | 31.4              | 57.7    | 28.6                                | 104.4                           |
| PLA/5MMT   | 92.0                  | 165.8   | 23.8              | 59.9    | 40.6                                | 97.1                            |
| PLA/10BC   | 98.2                  | 166.9   | 29.7              | 53.4    | 28.1                                | 103.1                           |
| PLA/20BC   | 97.1                  | 165.6   | 27.4              | 48.4    | 28.1                                | 99.0                            |
| PLA/10Talc | 93.2                  | 166.6   | 28.6              | 52.4    | 28.2                                | 115.4                           |
| PLA/20Talc | 92.7                  | 168.1   | 28.8              | 54.6    | 34.4                                | 117.0                           |

\* crystallinity calculated from the 1st heating stage
